# Supplementary material for: Rare Functional Variant in TM2D3 is Associated with Late-Onset Alzheimer's Disease
Source: PubMed Central journal article supplement (PMC5072721; doi:10.1371/journal.pgen.1006327), 2016-10-20

### SNPs in all genes

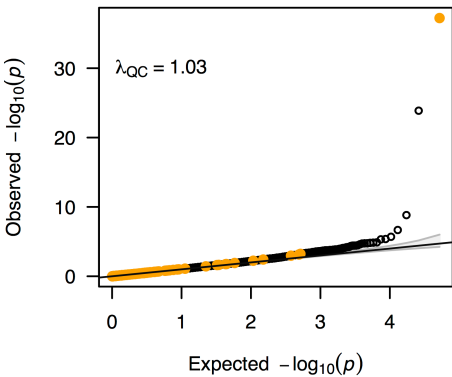

### SNPs in all genes except APOE

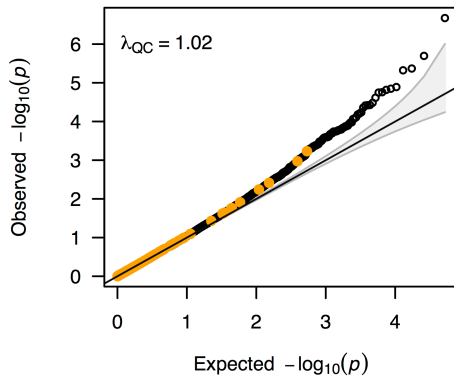

### SKAT for all genes

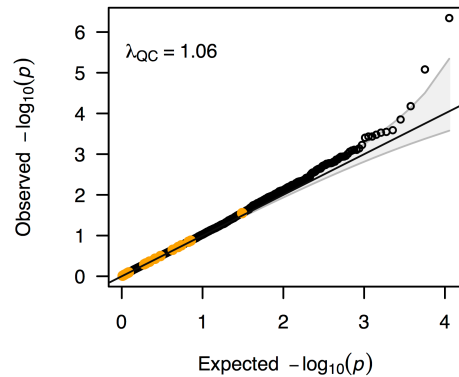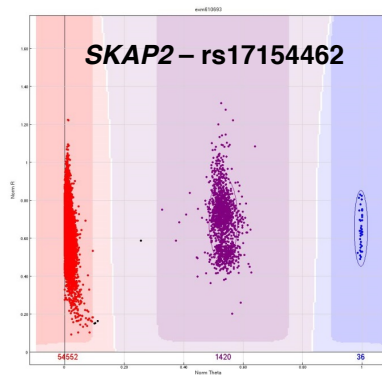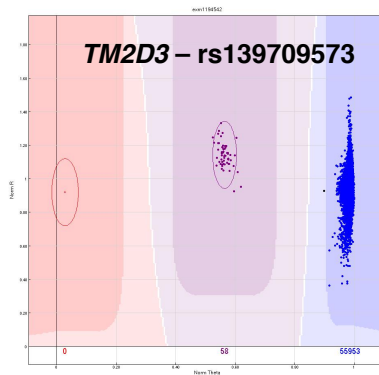

Supplement: pgen.1006327.s002.pdf [file pgen.1006327.s002.pdf]
