# Supplementary material for: Rare Functional Variant in TM2D3 is Associated with Late-Onset Alzheimer's Disease
Source: PubMed Central journal article supplement (PMC5072721; doi:10.1371/journal.pgen.1006327), 2016-10-20

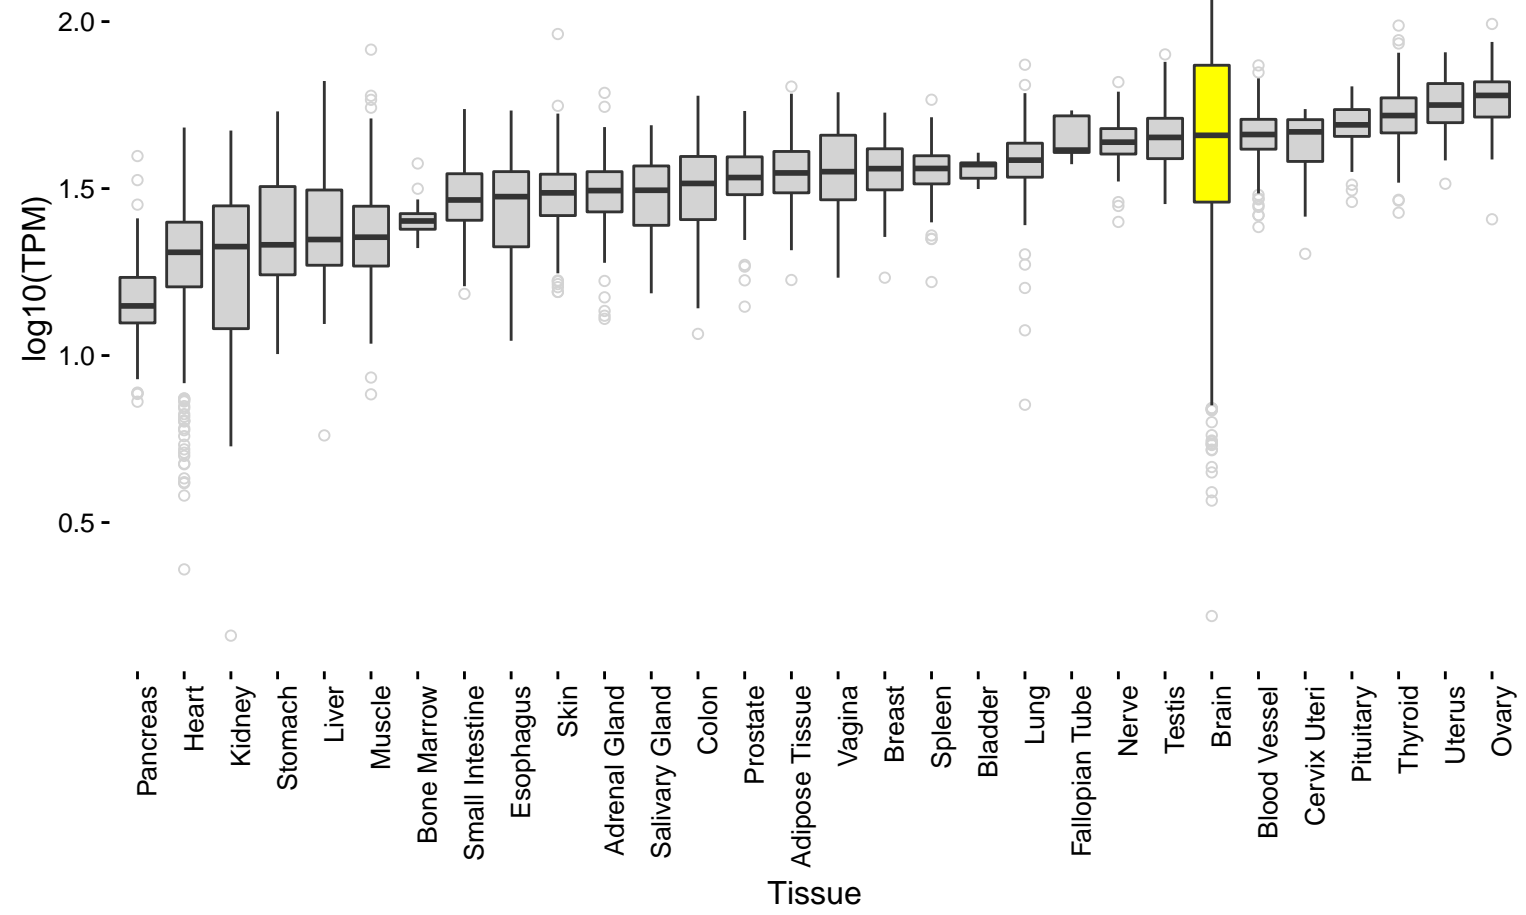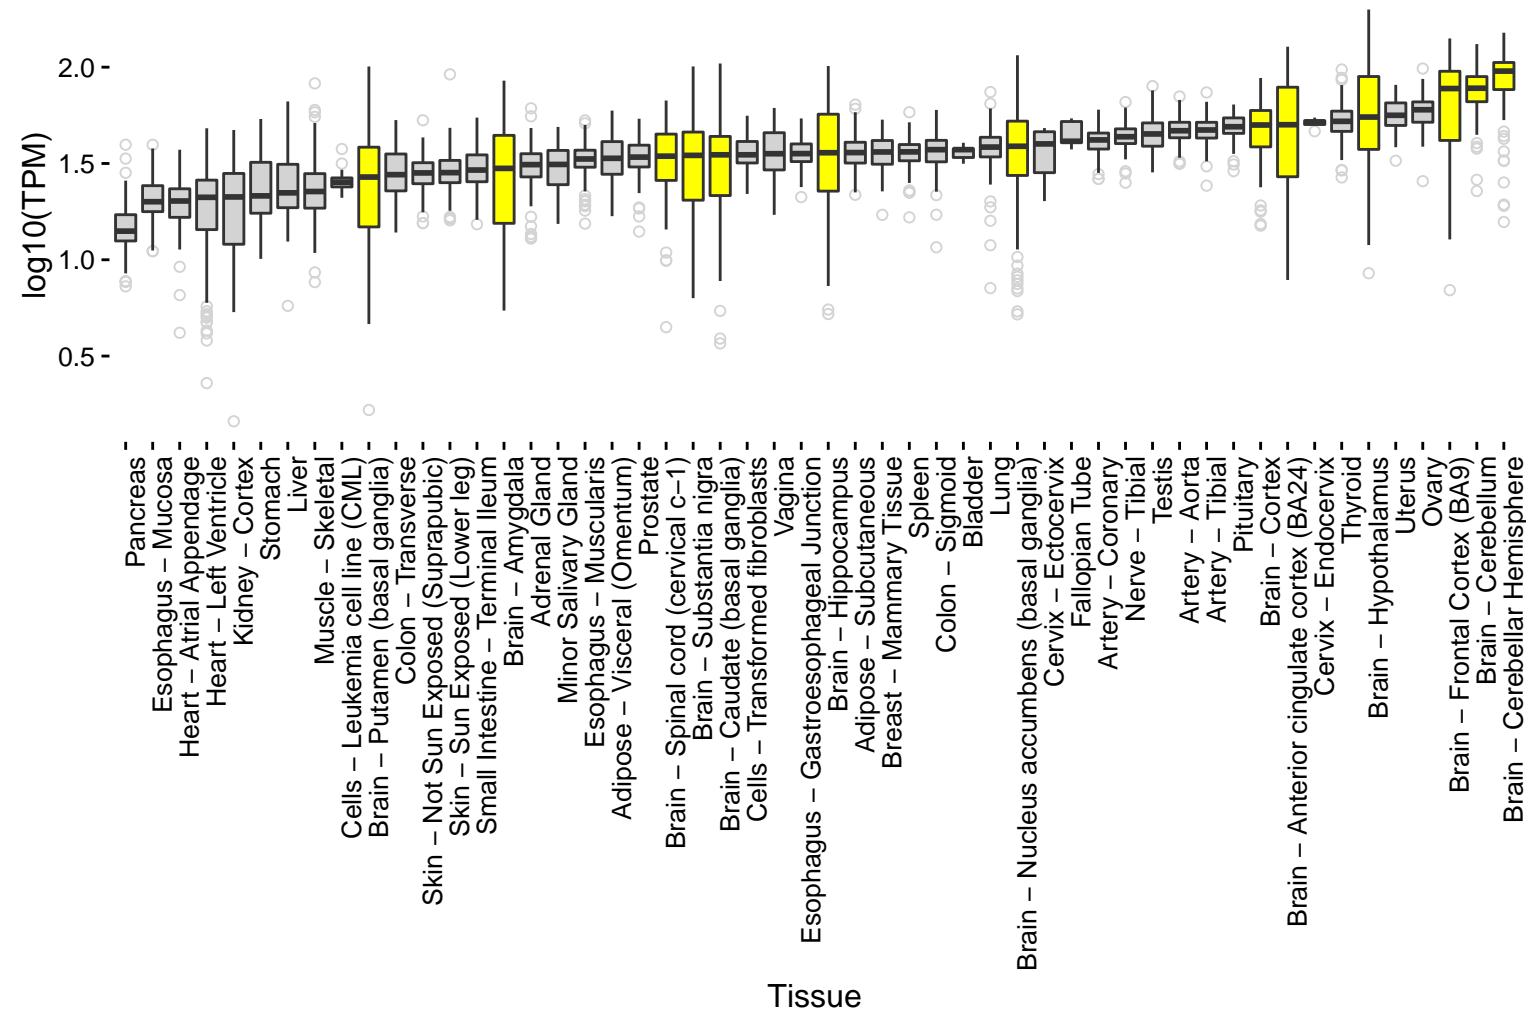

Supplement: pgen.1006327.s004.pdf [file pgen.1006327.s004.pdf]
