# Supplementary material for: Rare Functional Variant in TM2D3 is Associated with Late-Onset Alzheimer's Disease
Source: PubMed Central journal article supplement (PMC5072721; doi:10.1371/journal.pgen.1006327), 2016-10-20
Supplement: pgen.1006327.s005.pdf [file pgen.1006327.s005.pdf]

Any tissue

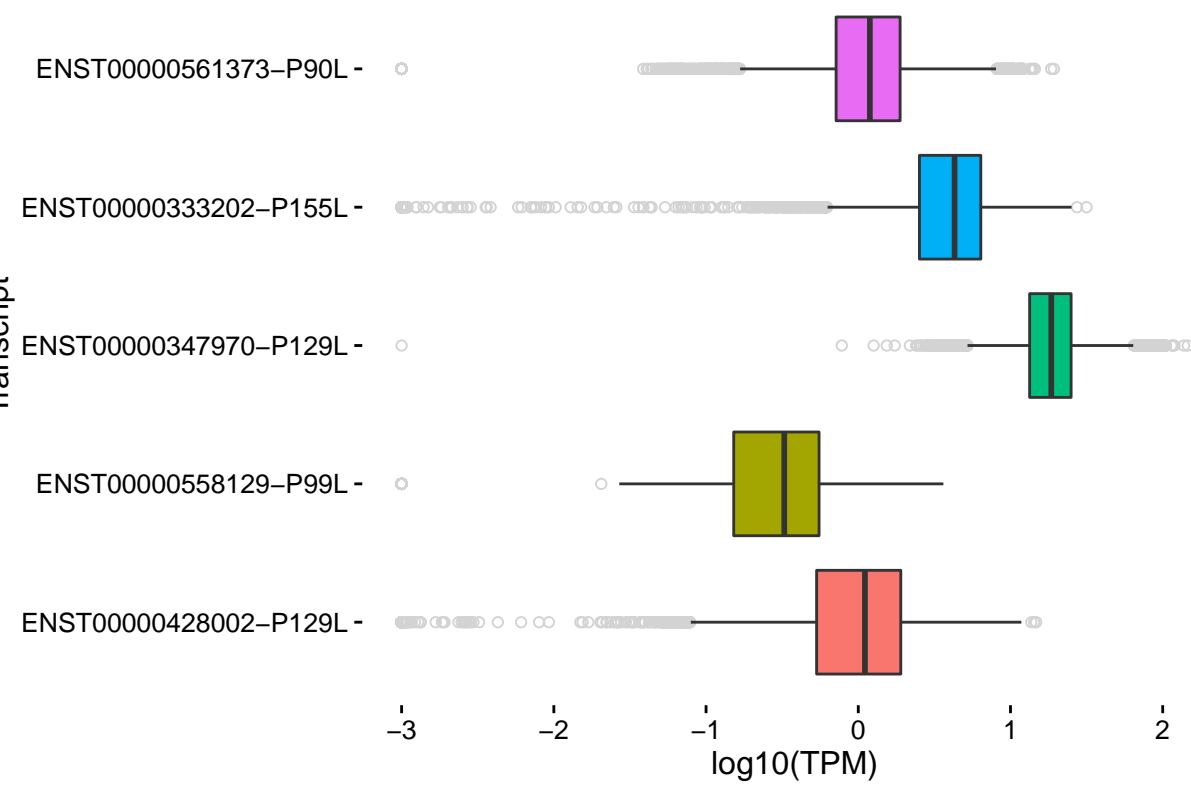

Brain

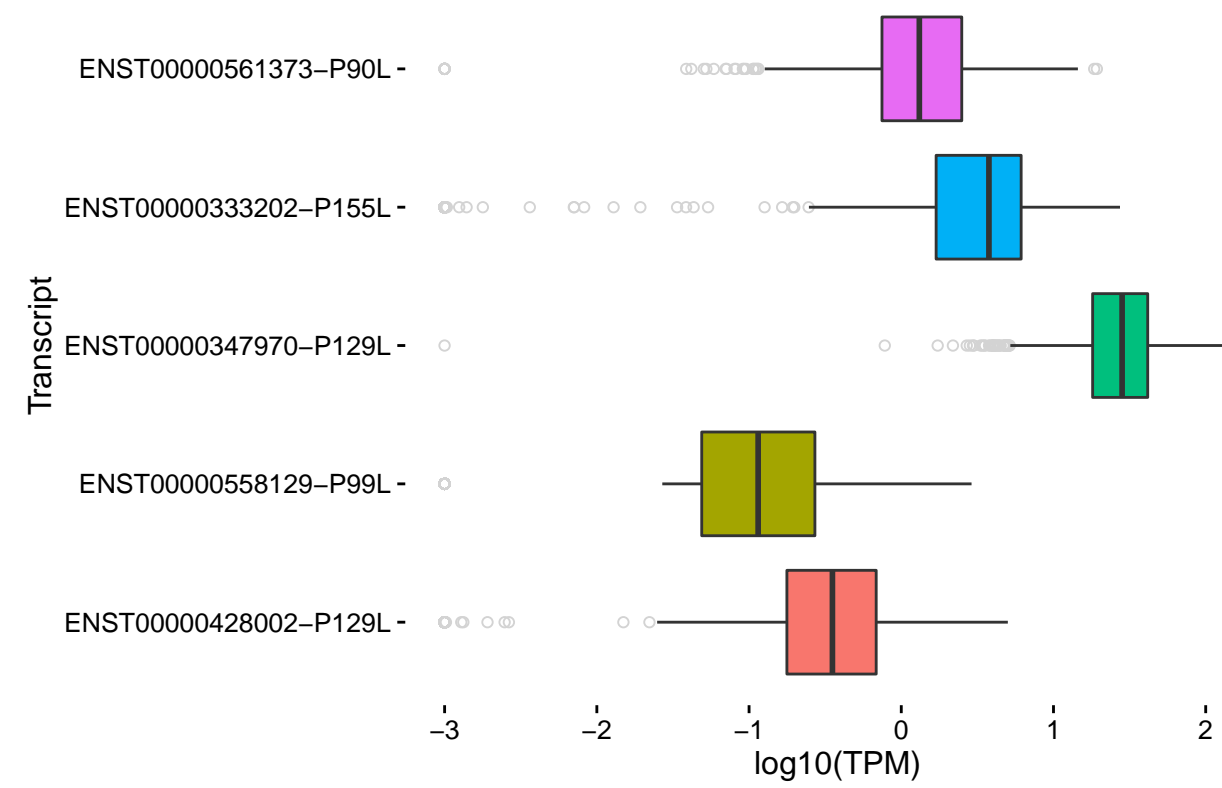

Brain-Hippocampus

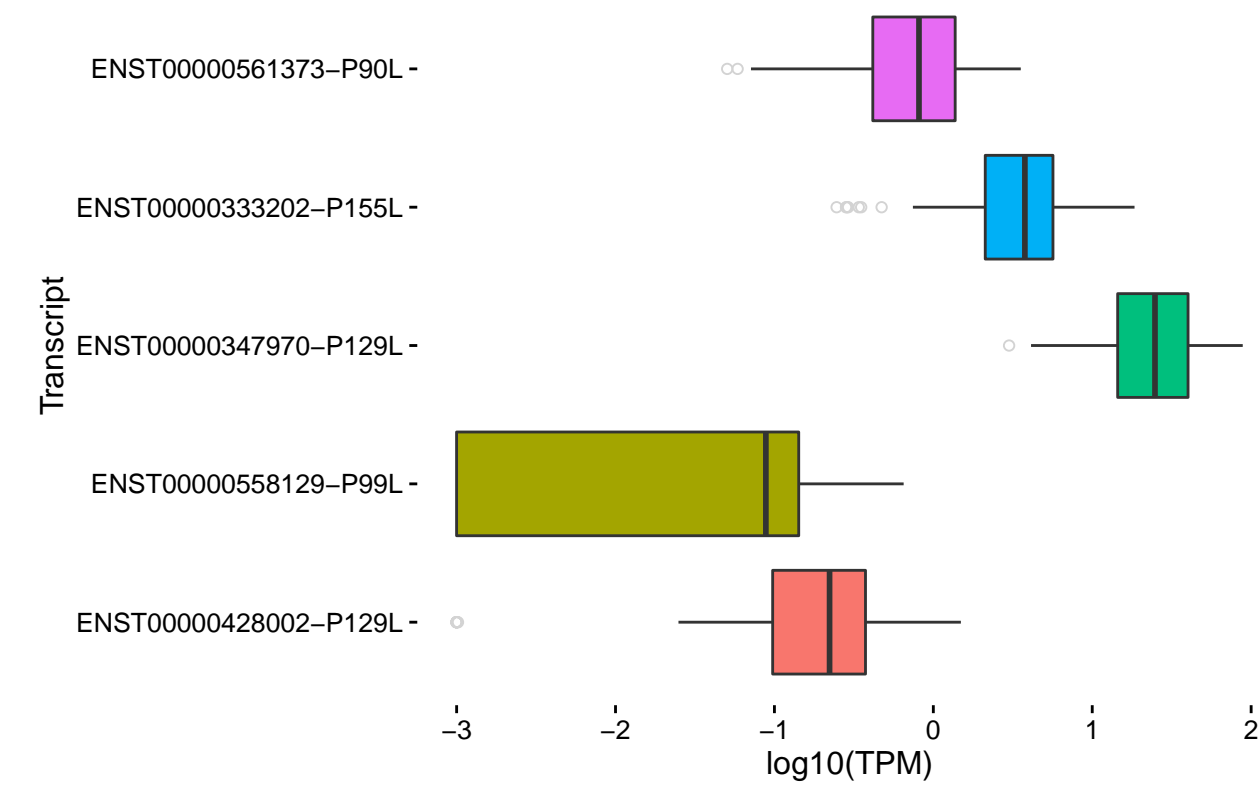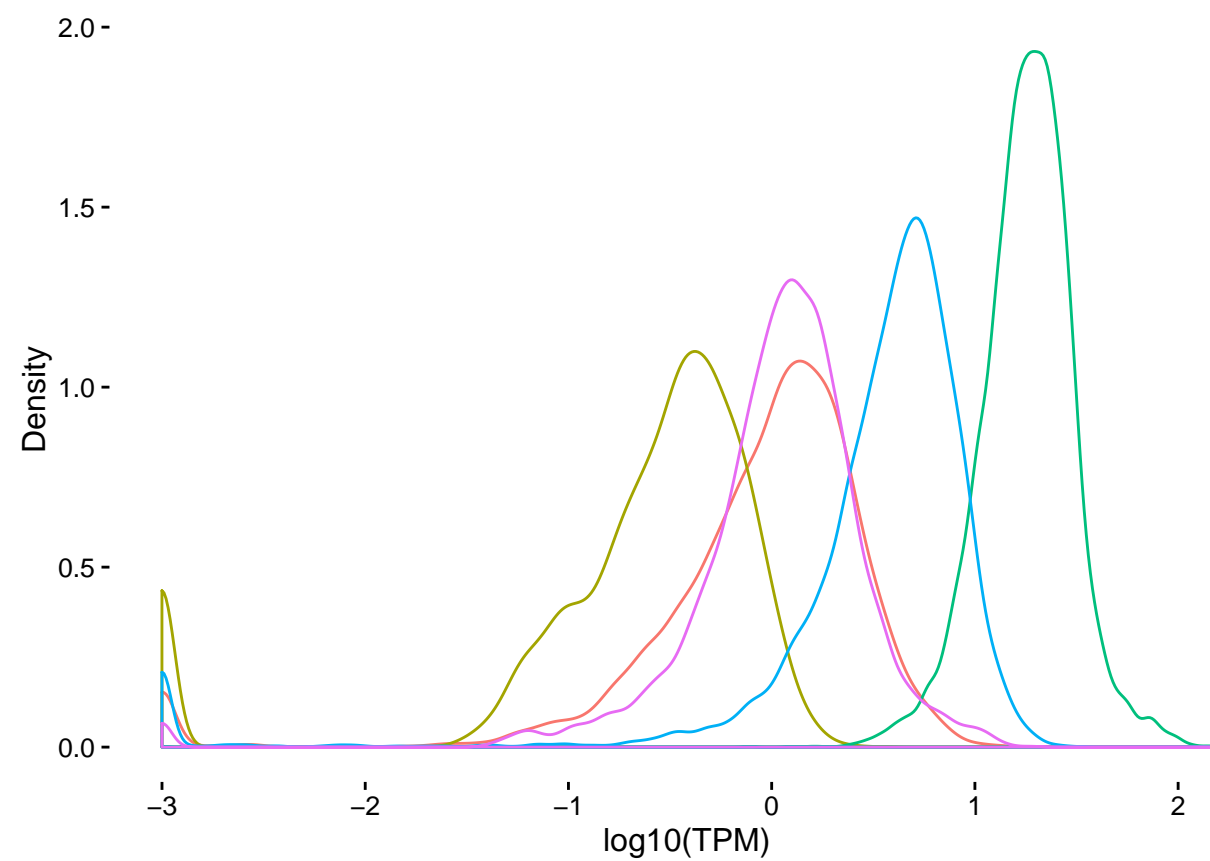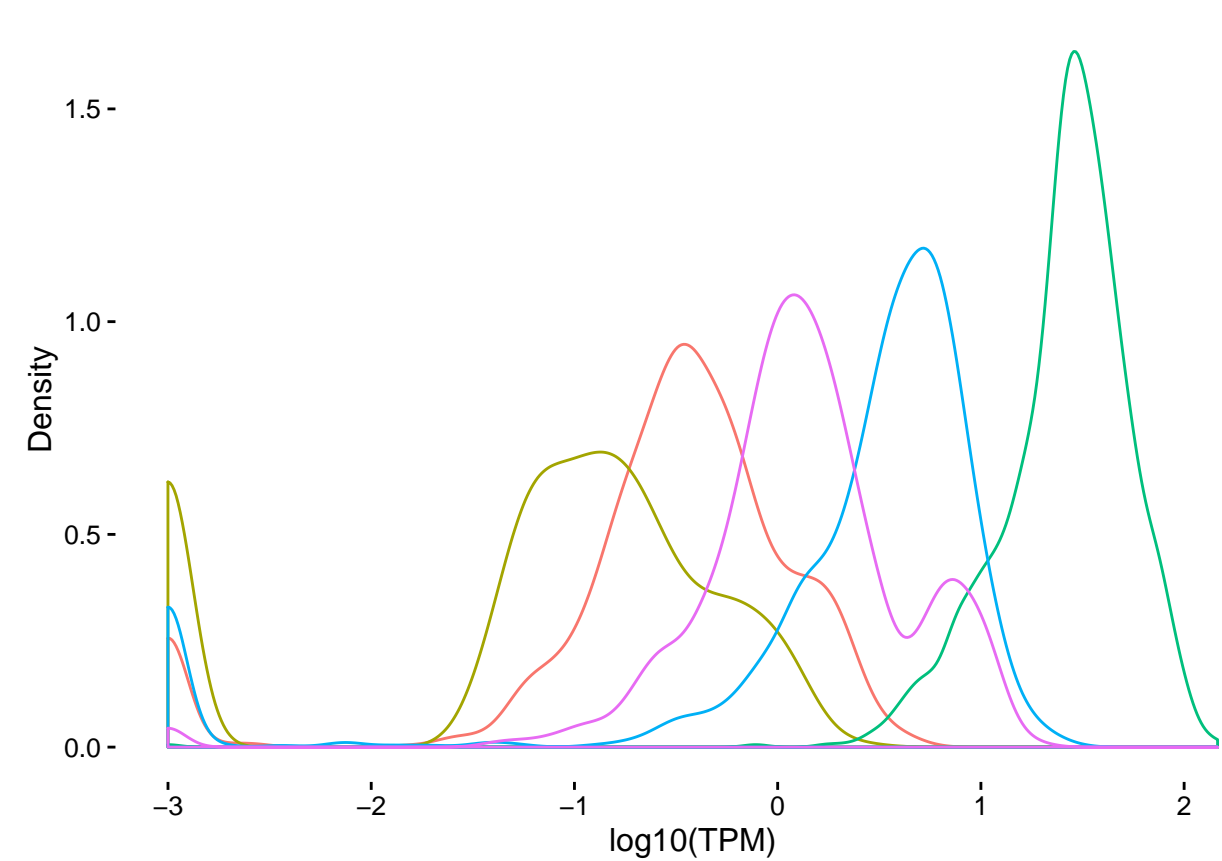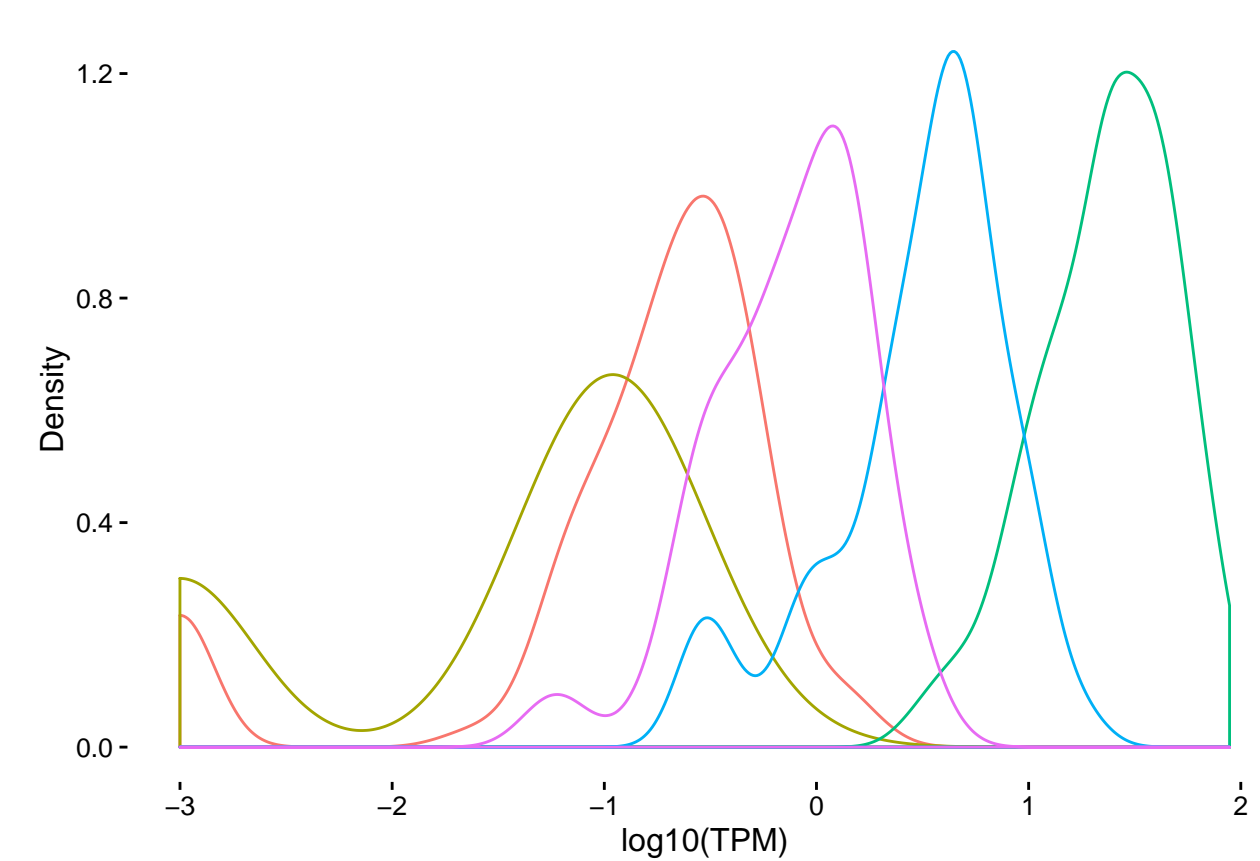

transcript ENST00000428002 ENST00000558129 ENST00000347970 ENST00000333202 ENST00000561373
