# Supplementary material for: Rare Functional Variant in TM2D3 is Associated with Late-Onset Alzheimer's Disease
Source: PubMed Central journal article supplement (PMC5072721; doi:10.1371/journal.pgen.1006327), 2016-10-20
Supplement: pgen.1006327.s008.pdf [file pgen.1006327.s008.pdf]

**Table S1 A: Top results of exome-wide single-variant discovery analysis. Results from top 10 SNPs shown.**

Full results available in dbGAP (accession phs000930)

| Variant     | Gene     | Chr | Position  | Function      | Alleles (uncoded/coded) | Single-variant Test |       |       |            | AF (%) in |          |       |
|-------------|----------|-----|-----------|---------------|-------------------------|---------------------|-------|-------|------------|-----------|----------|-------|
|             |          |     |           |               |                         | P-value             | Beta  | SE    | Direction* | All       | Controls | Cases |
| rs769449    | APOE     | 19  | 45410002  | intronic      | G/A                     | 5.82e-38            | 0.922 | 0.072 | ++++       | 11.29     | 10.38    | 16.62 |
| rs2075650   | TOMM40   | 19  | 45395619  | intronic      | A/G                     | 1.32e-24            | 0.669 | 0.065 | ++++       | 13.64     | 12.86    | 18.24 |
| rs6859      | PVRL2    | 19  | 45382034  | UTR3          | G/A                     | 1.51e-09            | 0.264 | 0.044 | ++++       | 40.78     | 39.96    | 45.61 |
| rs17154402  | SKAP2    | 7   | 26765085  | nonsynonymous | C/G                     | 2.12e-07            | 5.508 | 1.062 | 0+++       | 0.03      | 0.00     | 0.22  |
| rs139709573 | TM2D3    | 15  | 102186966 | nonsynonymous | G/A                     | 2.02e-06            | 4.086 | 0.860 | +0-0       | 0.15      | 0.14     | 0.25  |
| rs147960375 | C10orf68 | 10  | 33137574  | nonsynonymous | A/C                     | 4.27e-06            | 4.474 | 0.973 | ++++       | 0.05      | 0.02     | 0.22  |
| rs184982628 | HDAC2    | 6   | 114265517 | nonsynonymous | T/G                     | 4.75e-06            | 3.268 | 0.714 | 0+++       | 0.07      | 0.03     | 0.32  |
| rs146161342 | LAMB4    | 7   | 107671360 | nonsynonymous | T/C                     | 1.29e-05            | 3.382 | 0.775 | 0+++       | 0.06      | 0.02     | 0.29  |
| rs145098571 | LRRN4    | 20  | 6031509   | nonsynonymous | T/C                     | 1.42e-05            | 4.133 | 0.952 | 0+-        | 0.05      | 0.02     | 0.22  |
| rs200181512 | EPHA10   | 1   | 38184439  | nonsynonymous | C/T                     | 1.52e-05            | 4.055 | 0.938 | 0+++       | 0.05      | 0.02     | 0.22  |

\* Order of studies: AGES, CHS, FHS, RS

**Table S1 B: Top results of exome-wide SKAT discovery analysis. Results from 10 genes shown.**

Full results available in dbGAP (accession phs000930)

| Gene    | Chr | Position  | SKAT P-value | Details on SKAT    |                   |                        |                     |
|---------|-----|-----------|--------------|--------------------|-------------------|------------------------|---------------------|
|         |     |           |              | # variants in test | cumMAF in all (%) | cumMAF in controls (%) | cumMAF in cases (%) |
| SKAP2   | 7   | 26839792  | 4.53e-07     | 3                  | 0.06              | 0.02                   | 0.25                |
| TM2D3   | 15  | 102189590 | 8.29e-06     | 4                  | 0.24              | 0.24                   | 0.25                |
| ADCY5   | 3   | 123052275 | 6.63e-05     | 13                 | 0.82              | 0.80                   | 0.93                |
| SLC6A9  | 1   | 44472932  | 0.000141     | 6                  | 0.38              | 0.37                   | 0.47                |
| THOC6   | 16  | 3076762   | 0.000258     | 8                  | 0.19              | 0.12                   | 0.61                |
| GGA1    | 22  | 38023290  | 0.000284     | 5                  | 1.57              | 1.40                   | 3.15                |
| FOLR3   | 11  | 71850463  | 0.000297     | 3                  | 0.36              | 0.28                   | 0.79                |
| CCDC117 | 22  | 29178015  | 0.000334     | 2                  | 1.35              | 1.26                   | 1.87                |
| CLMN    | 14  | 95678525  | 0.000369     | 18                 | 1.00              | 0.93                   | 1.40                |
| SRBD1   | 2   | 45771861  | 0.00037      | 24                 | 1.71              | 1.80                   | 1.17                |
