# Supplementary material for: Rare Functional Variant in TM2D3 is Associated with Late-Onset Alzheimer's Disease
Source: PubMed Central journal article supplement (PMC5072721; doi:10.1371/journal.pgen.1006327), 2016-10-20
Supplement: pgen.1006327.s009.pdf [file pgen.1006327.s009.pdf]

**Table S2 Variant- and study-specific break-down of *TM2D3*, *SKAP2*, and *APOE* results**

| Gene         | SNP         | SKAT             | AF    | Annotation | META     |       |      | AGES  |      | CHS   |      | FHS   |      | RS    |      |
|--------------|-------------|------------------|-------|------------|----------|-------|------|-------|------|-------|------|-------|------|-------|------|
|              |             | (%) <sup>a</sup> | (%)   |            | p        | beta  | se   | beta  | se   | beta  | se   | beta  | se   | Beta  | se   |
| <i>TM2D3</i> | rs80221524  | 0.00             | 0.00  | NS         |          |       |      |       |      |       |      |       |      |       |      |
| <i>TM2D3</i> | rs139709573 | 91.18            | 0.15  | NS         | 2.02e-06 | 4.09  | 0.86 | 5.09  | 0.94 |       |      | -1.15 | 2.14 |       |      |
| <i>TM2D3</i> | rs145296809 | 0.00             | 0.00  | NS         |          |       |      |       |      |       |      |       |      |       |      |
| <i>TM2D3</i> | rs151143463 | 0.00             | 0.00  | NS         |          |       |      |       |      |       |      |       |      |       |      |
| <i>TM2D3</i> | rs150334018 | 8.76             | 0.08  | NS         | 0.159    | -1.18 | 0.84 | -1.07 | 2.43 | -1.20 | 1.37 | -1.08 | 2.31 | -1.23 | 1.37 |
| <i>TM2D3</i> | rs146538174 | 0.03             | 0.01  | NS         | 0.733    | -1.12 | 3.28 |       |      | -1.12 | 3.28 |       |      |       |      |
| <i>TM2D3</i> | rs181135440 | 0.02             | 0.01  | NS         | 0.76     | -1.09 | 3.58 |       |      |       |      |       |      | -1.09 | 3.58 |
| <i>TM2D3</i> | rs148089973 | 0.00             | 0.00  | NS         |          |       |      |       |      |       |      |       |      |       |      |
| <i>TM2D3</i> | rs184326854 | 0.00             | 0.00  | NS         |          |       |      |       |      |       |      |       |      |       |      |
| <i>SKAP2</i> | rs7804356   | 0.00             | 25.15 | intronic   | 0.752    | -0.02 | 0.05 | -0.03 | 0.14 | 0.09  | 0.08 | -0.07 | 0.12 | -0.10 | 0.09 |
| <i>SKAP2</i> | rs199915571 | 0.00             | 0.00  | NS         |          |       |      |       |      |       |      |       |      |       |      |
| <i>SKAP2</i> | rs200813179 | 0.00             | 0.00  | NS         |          |       |      |       |      |       |      |       |      |       |      |
| <i>SKAP2</i> | rs17154402  | 99.84            | 0.03  | NS         | 2.12e-07 | 5.51  | 1.06 |       |      | 6.16  | 1.57 | 5.53  | 2.60 | 4.69  | 1.74 |
| <i>SKAP2</i> | rs1129771   | 0.00             | 8.89  | NS         | 0.305    | -0.08 | 0.08 | -0.13 | 0.21 | -0.18 | 0.13 | -0.05 | 0.17 | 0.04  | 0.14 |
| <i>SKAP2</i> | rs147926422 | 0.00             | 0.00  | NS         |          |       |      |       |      |       |      |       |      |       |      |
| <i>SKAP2</i> | rs145659190 | 0.08             | 0.01  | NS         | 0.685    | -1.17 | 2.88 |       |      | -1.17 | 2.88 |       |      |       |      |
| <i>SKAP2</i> | rs137938529 | 0.08             | 0.02  | NS         | 0.862    | 0.22  | 1.29 |       |      | -1.14 | 3.04 |       |      | 0.52  | 1.42 |
| <i>APOE</i>  | rs769449    | 0.00             | 11.29 | intronic   | 5.82e-38 | 0.92  | 0.07 | 0.98  | 0.20 | 0.74  | 0.12 | 1.23  | 0.19 | 0.94  | 0.11 |
| <i>APOE</i>  | rs769452    | 90.52            | 0.34  | NS         | 0.801    | 0.09  | 0.37 | -0.13 | 0.98 | 0.39  | 0.65 | 0.02  | 1.13 | -0.04 | 0.57 |
| <i>APOE</i>  | rs769455    | 3.22             | 0.01  | NS         | 0.722    | -1.07 | 3.00 |       |      |       |      | -1.07 | 3.00 |       |      |
| <i>APOE</i>  | exm1479365  | 6.26             | 0.01  | NS         | 0.656    | -1.20 | 2.69 |       |      | -1.20 | 2.69 |       |      |       |      |
| <i>APOE</i>  | rs7412      | 0.00             | 7.38  | NS         | 0.000732 | -0.34 | 0.10 | -0.17 | 0.26 |       |      | -0.27 | 0.20 | -0.42 | 0.13 |
| <i>APOE</i>  | exm1479367  | 0.00             | 0.00  | NS         |          |       |      |       |      |       |      |       |      |       |      |

a % contribution to the set-based SKAT statistic.

b NS = non-synonymous
