# Supplementary material for: Rare Functional Variant in TM2D3 is Associated with Late-Onset Alzheimer's Disease
Source: PubMed Central journal article supplement (PMC5072721; doi:10.1371/journal.pgen.1006327), 2016-10-20
Supplement: pgen.1006327.s010.pdf [file pgen.1006327.s010.pdf]

**Table S3 Allele frequency of P155L in populations of European ancestry**

| <b>Cohort</b>       | <b>Population</b>          | <b>Sample size</b> | <b>MAF (%)</b> |
|---------------------|----------------------------|--------------------|----------------|
| CHARGE <sup>a</sup> | European/European American | 40102              | 0.03           |
| ESP <sup>b</sup>    | European/European American | 8595               | 0.06           |
| ExAC <sup>c</sup>   | European (non-Finnish)     | 66720              | 0.03           |
| ExAC <sup>c</sup>   | Finland                    | 8654               | 0.00           |
| ADGC                | US (European American)     | 14349              | 0.02           |
| GERAD               | UK and Germany             | 7234               | 0.06           |
| Generation Scotland | Scotland, UK               | 20240              | 0.04           |
| GLACIER             | Sweden                     | 965                | 0.00           |
| DIABNORD            | Sweden                     | 928                | 0.00           |
| FIA3                | Sweden                     | 2657               | 0.00           |
| Finrisk             | Finland                    | 15929              | 0.00           |

a All, except AGES, European American cohorts who participated in the CHARGE exome chip genotyping included in MAF estimation regardless of phenotype availability [1].

b Exome Variant Server, NHLBI GO, Exome Sequencing Project (ESP), Seattle, WA (URL: <http://evs.gs.washington.edu/EVS>) [release ESP6500SI-V2, accessed September 2 2015]

c Exome Aggregation Consortium (ExAC) [2], Cambridge, MA (URL: <http://exac.broadinstitute.org>) [Version 0.3, accessed February 16 2016].

#### Referneces

1. Grove ML, Yu B, Cochran BJ, Haritunians T, Bis JC, Taylor KD, et al. Best practices and joint calling of the HumanExome BeadChip: the CHARGE Consortium. *PLoS One*. 2013;8: e68095. doi:10.1371/journal.pone.0068095
2. Lek M, Karczewski KJ, Minikel E V., Samocha KE, Banks E, Fennell T, et al. Analysis of protein-coding genetic variation in 60,706 humans. *Nature*. *Nature Research*; 2016;536: 285–291. doi:10.1038/nature19057
